# Supplementary material for: Targeting eIF4A-dependent translation in genetically complex sarcoma
Source: JCI journal article supplement (doi:10.1172/jci.insight.192936), 2026-04-07
Supplement: sd2 [file 2]

Figure 1D

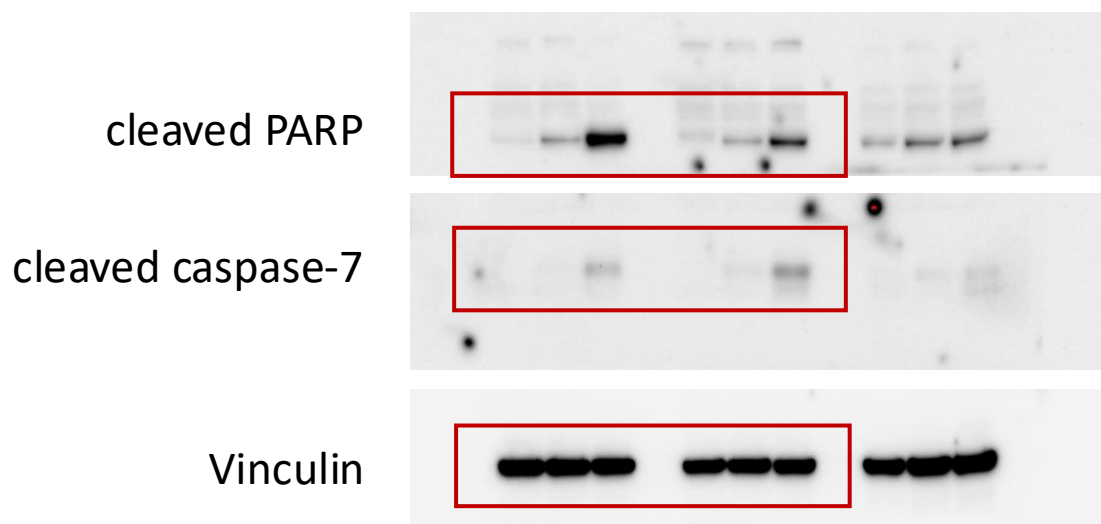

Figure 2D

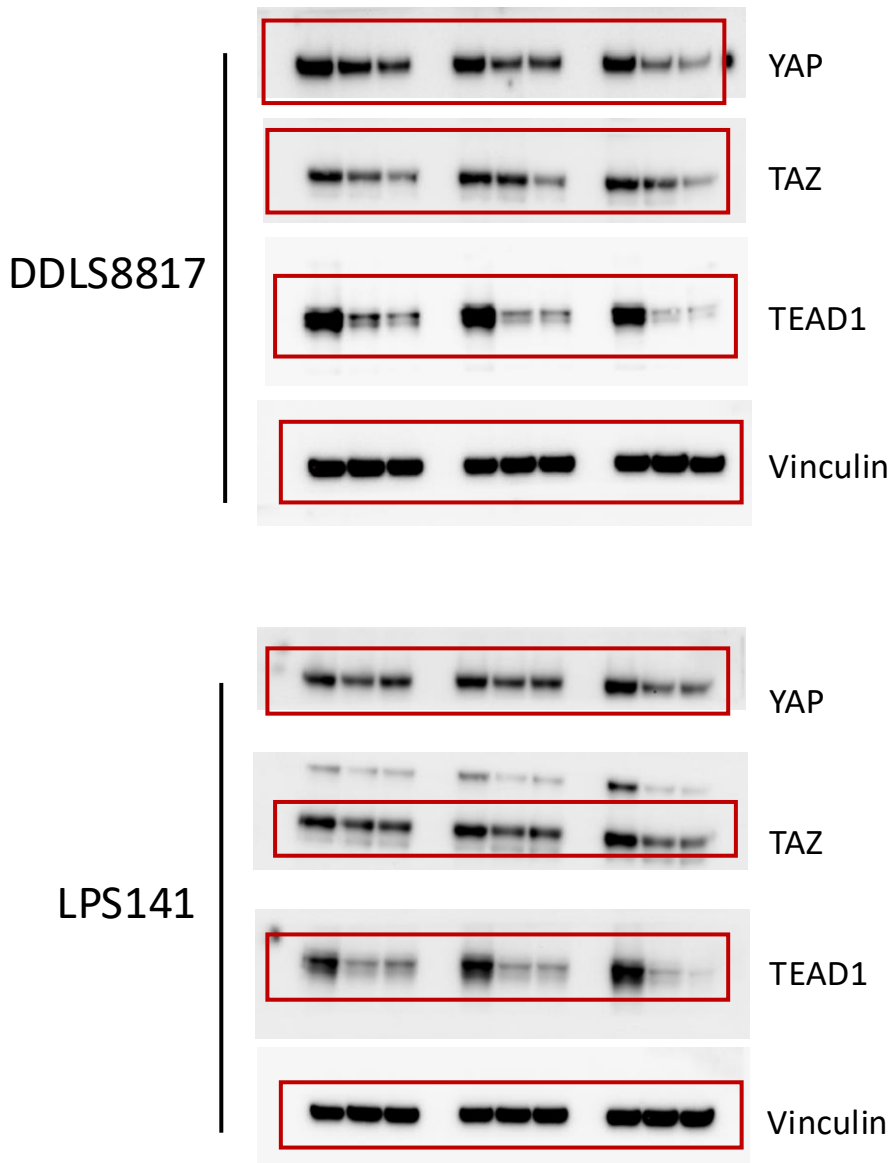

Figure 3B

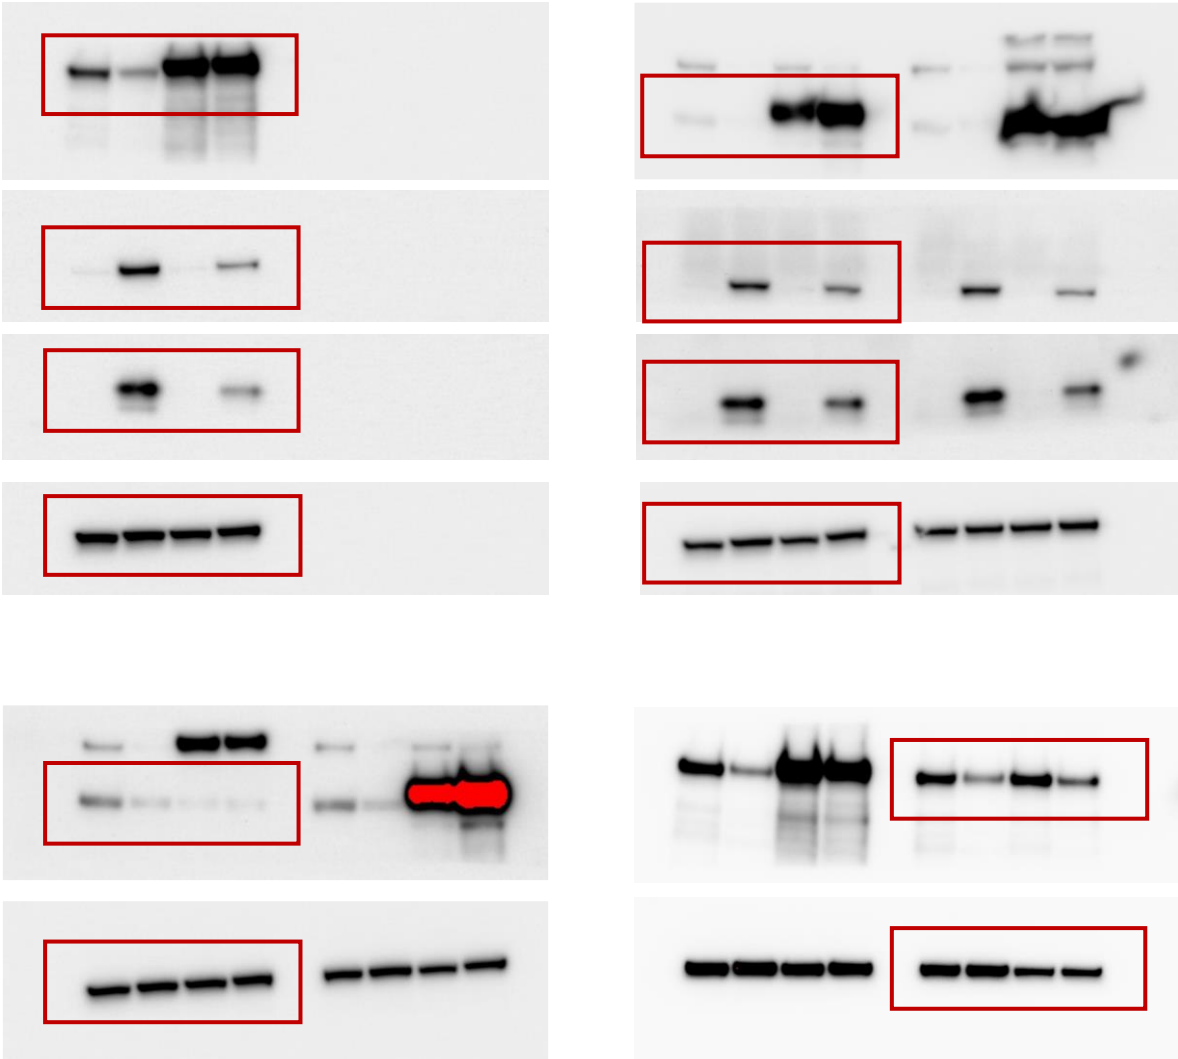

Figure 4C

MFS8000s

UPS3672-3

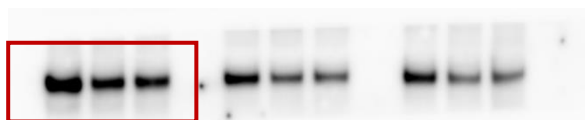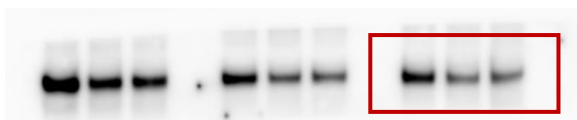

YAP

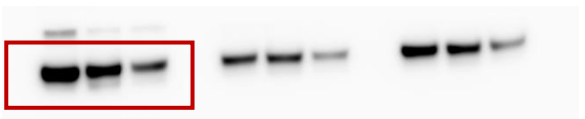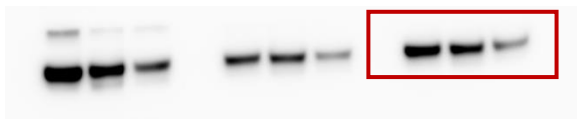

TAZ

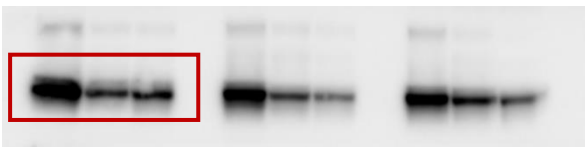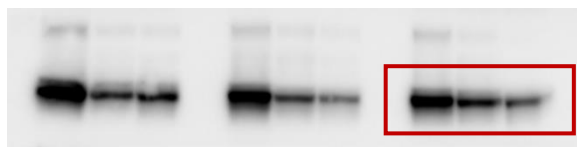

TEAD1

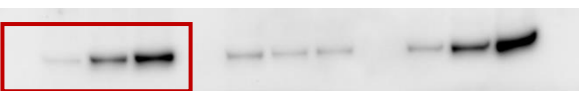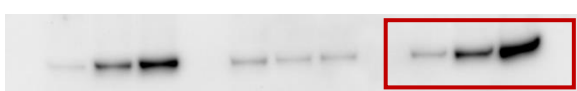

cleaved PARP

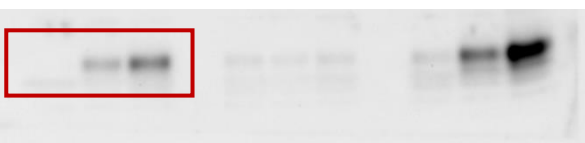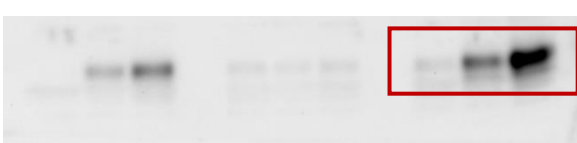

cleaved  
caspase-7

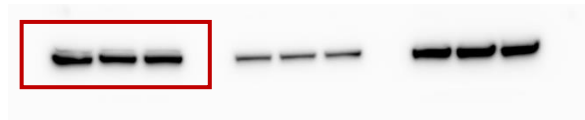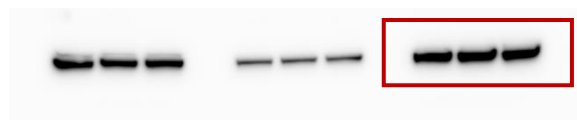

Vinculin

Figure 6A

DDLS8817

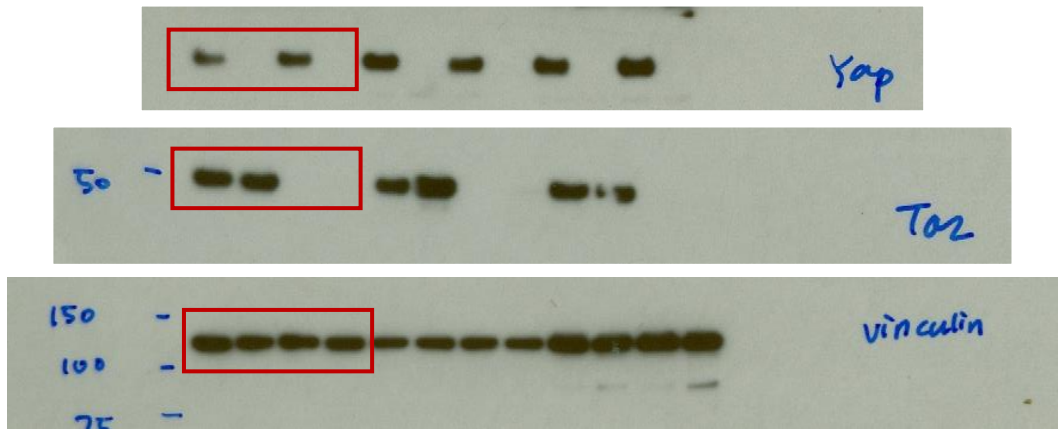

LPS141

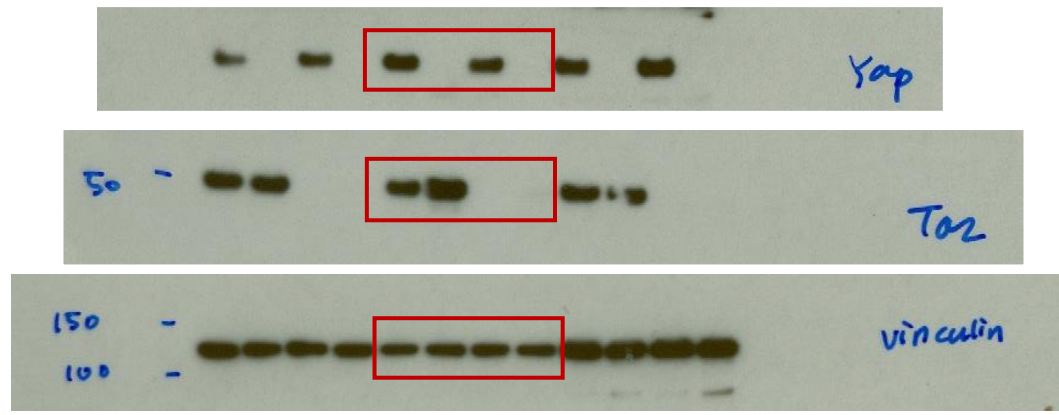

Figure 6A

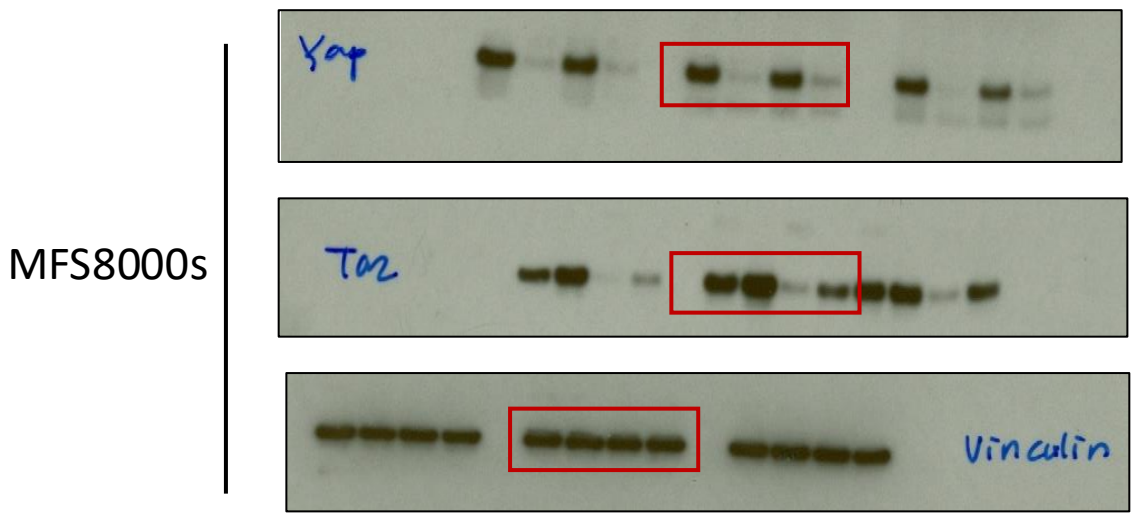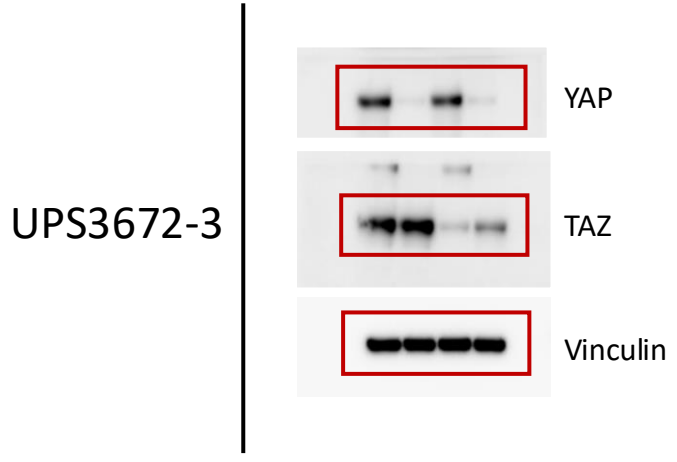

Figure 7E

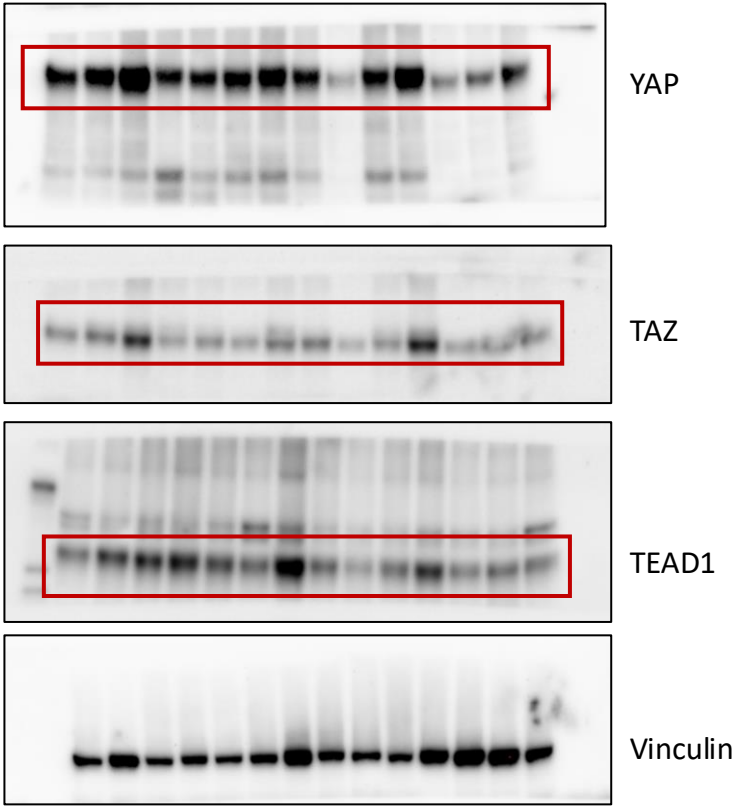

Supplementary Figure 1A

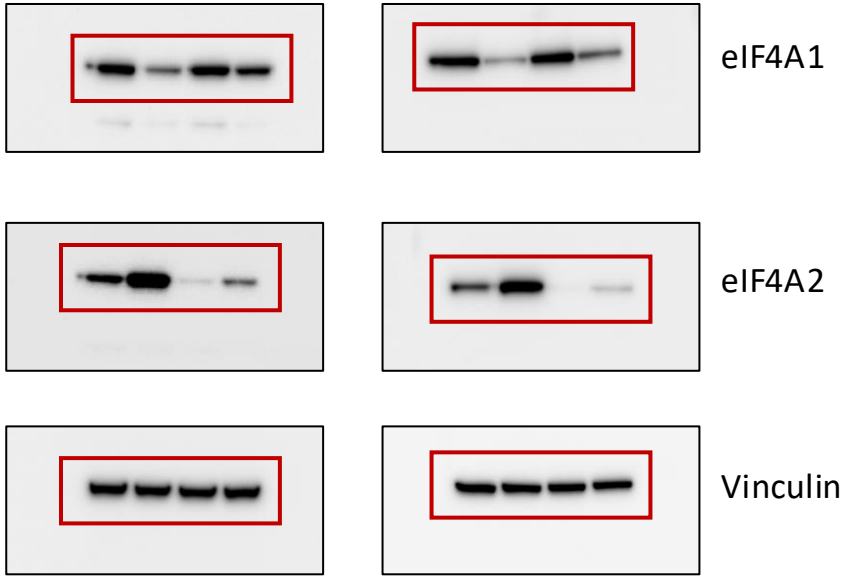

# Supplementary Figure 2C

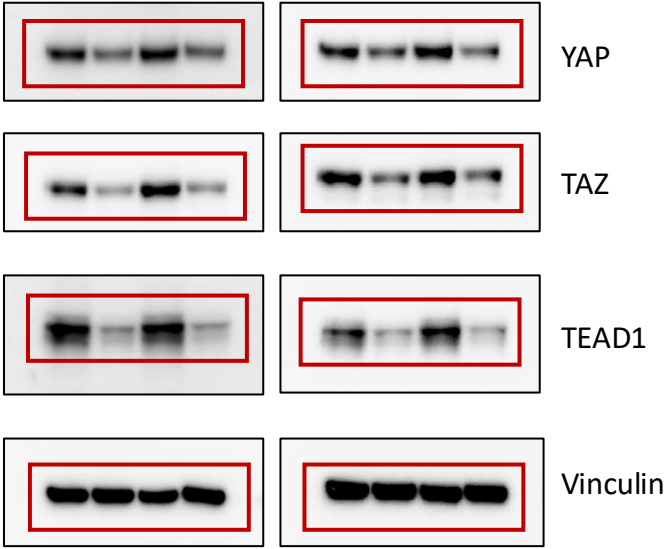

# Supplementary Figure 3A

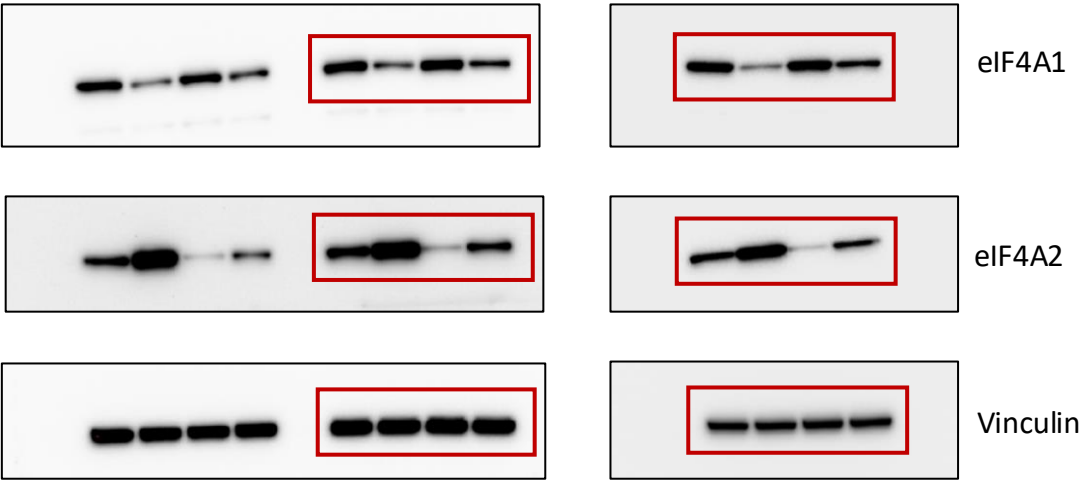

# Supplementary Figure 5C

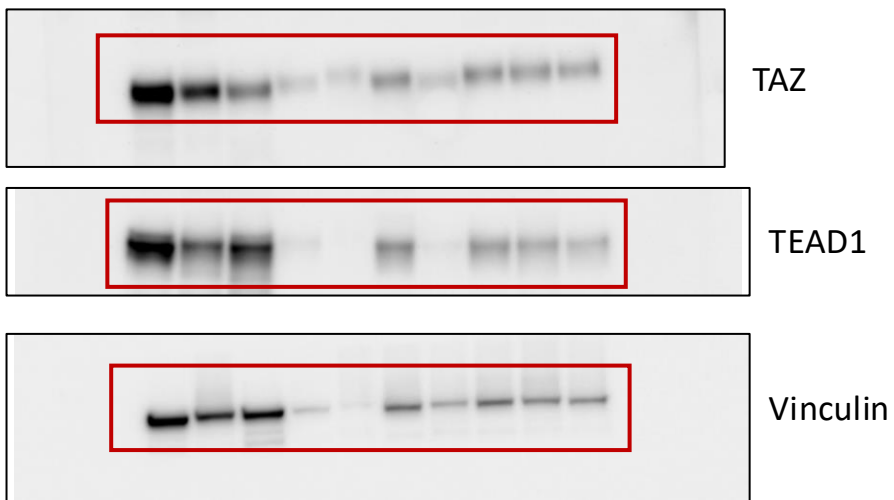

# Supplementary Figure 5E

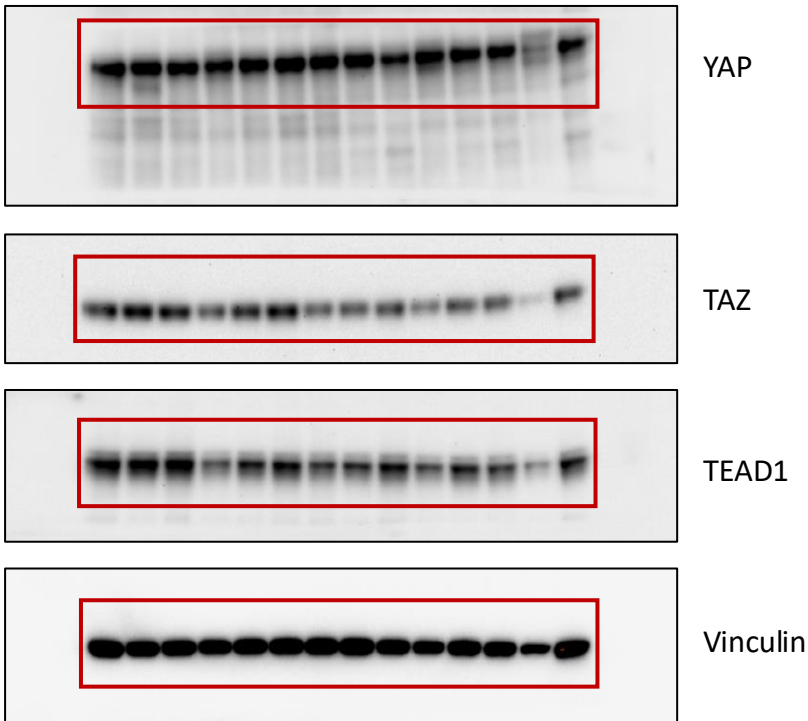

Supplementary Figure 6D

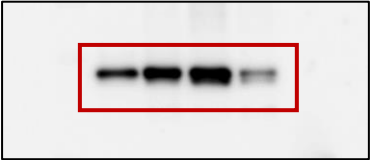

eIF4A2

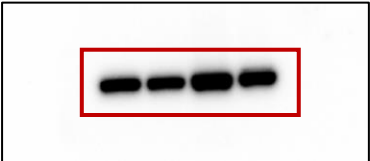

Vinculin
